# Supplementary material for: A comparative study of doping effects of V and Cr on a SrAlSi superconductor
Source: Royal Society of Chemistry journal article supplement (doi:10.1039/c6ra17081a), 2016-01-01
Supplement: c6ra17081a1.pdf [file c6ra17081a1.pdf]

## A comparative study of doping effects of V and Cr on SrAlSi superconductor

Zhiping Lin,<sup>a</sup> Shijie Shen,<sup>a</sup> Kunkun Li,<sup>a</sup> Han Zhang,<sup>a</sup> Duanduan Yuan,<sup>a</sup> Shifeng Jin,<sup>\*a</sup> Liwei Guo<sup>\*a</sup>

<sup>a</sup> Research and Development Center for Functional Crystals, Beijing National Laboratory for Condensed Matter Physics, Institute of Physics, Chinese Academy of Sciences, Beijing 100190, China.

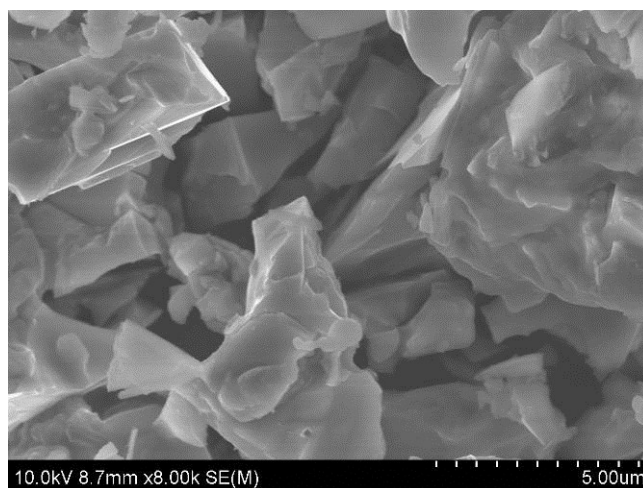

(a)

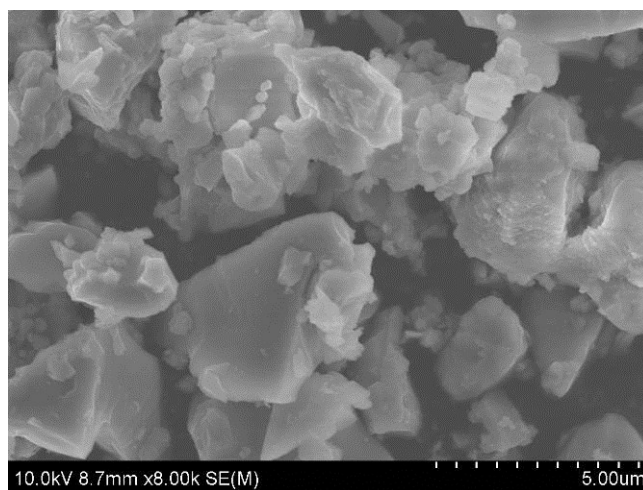

(b)

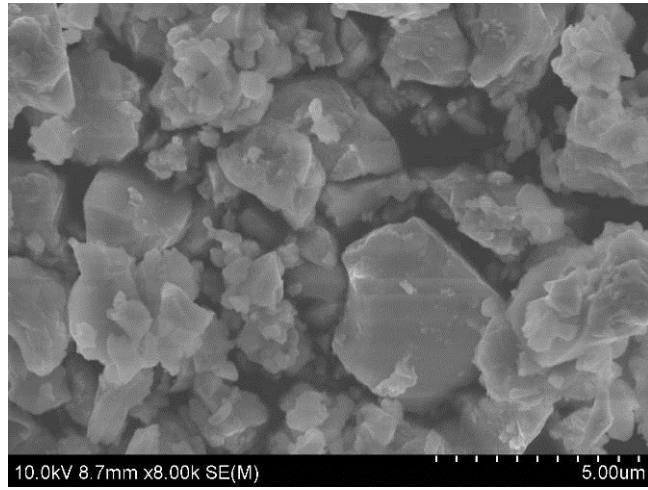

(c)

**Figure S1. The SEM morphologies of (a) SrAlSi, (b) SrAl<sub>0.9</sub>V<sub>0.1</sub>Si and (c) SrAl<sub>0.8</sub>V<sub>0.2</sub>Si samples.**

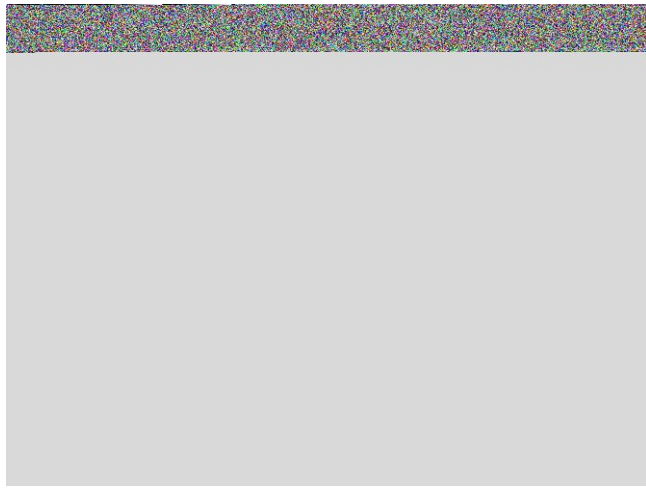

(a)

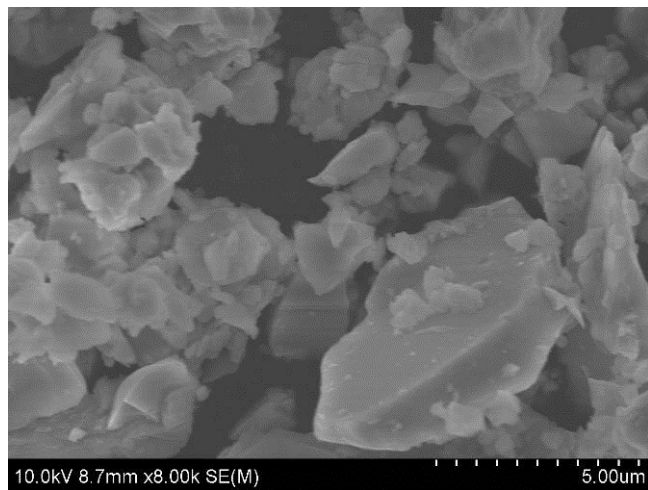

(b)

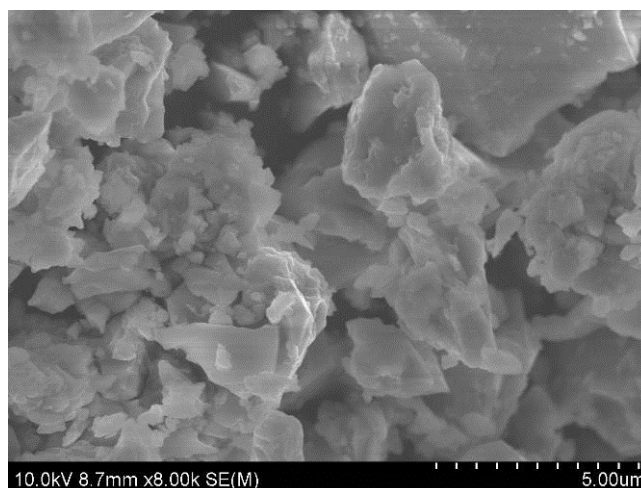

(c)

**Figure S2.** The SEM morphologies of (a) SrAlSi, (b) SrAl<sub>0.9</sub>Cr<sub>0.1</sub>Si and (c) SrAl<sub>0.7</sub>Cr<sub>0.3</sub>Si samples.

**Table S1.** EDX analysis of elemental compositions for a series of SrAl<sub>1-x</sub>V<sub>x</sub>Si ( $x = 0, 0.05, 0.1, 0.15$  and  $0.2$ ) and SrAl<sub>1-x</sub>Cr<sub>x</sub>Si ( $x = 0, 0.1, 0.2$  and  $0.3$ ) compounds.

| SrAl <sub>1-x</sub> V <sub>x</sub> Si |                                   | SrAl <sub>1-x</sub> Cr <sub>x</sub> Si |                                    |
|---------------------------------------|-----------------------------------|----------------------------------------|------------------------------------|
| Nominal V content ( $x$ )             | Measured composition (Sr:Al:V:Si) | Nominal Cr content ( $x$ )             | Measured composition (Sr:Al:Cr:Si) |
| 0                                     | 1.02:0.93:0:1                     | 0                                      | 1.02:0.93:0:1                      |
| 0.05                                  | 1.12:0.84:0.05:1                  | 0.1                                    | 1.06:0.85:0.09:1                   |
| 0.10                                  | 1.05:0.88:0.11:1                  | 0.2                                    | 1.10:0.83:0.11:1                   |
| 0.15                                  | 1.02:0.83:0.14:1                  | 0.3                                    | 1.08:0.81:0.13:1                   |
| 0.20                                  | 1.04:0.79:0.16:1                  |                                        |                                    |

Refinements details: For X-ray diffraction, in the final run, the following parameters were refined: zero-point, half-width, peak shape, preferred orientation, asymmetry, scale factor and unit cell parameters and the positional parameter of V/Cr.

**Table S2.** Summary of Rietveld refinement parameters in hexagonal AlB<sub>2</sub> structure for SrAl<sub>1-x</sub>V<sub>x</sub>Si ( $x = 0, 0.05, 0.1, 0.15$  and  $0.2$ ).

| Nominal     | SrAlSi         | SrAl <sub>0.95</sub> V <sub>0.05</sub> Si    | SrAl <sub>0.9</sub> V <sub>0.1</sub> Si     | SrAl <sub>0.85</sub> V <sub>0.15</sub> Si    | SrAl <sub>0.8</sub> V <sub>0.2</sub> Si     |
|-------------|----------------|----------------------------------------------|---------------------------------------------|----------------------------------------------|---------------------------------------------|
| Refined     | SrAlSi         | SrAl <sub>0.95</sub> V <sub>0.05(2)</sub> Si | SrAl <sub>0.9</sub> V <sub>0.11(2)</sub> Si | SrAl <sub>0.85</sub> V <sub>0.14(1)</sub> Si | SrAl <sub>0.8</sub> V <sub>0.16(1)</sub> Si |
| Space group | P6/ <i>mmm</i> |                                              |                                             |                                              |                                             |
| $a$ (Å)     | 4.2415 (4)     | 4.2349 (6)                                   | 4.2323 (3)                                  | 4.2298 (5)                                   | 4.2253 (3)                                  |
| $c$ (Å)     | 4.7499 (5)     | 4.7505 (4)                                   | 4.7507 (7)                                  | 4.7495 (5)                                   | 4.7509 (9)                                  |
| $R_p$       | 4.64 %         | 4.74%                                        | 3.89%                                       | 5.58%                                        | 4.44%                                       |

|           |        |       |       |        |       |
|-----------|--------|-------|-------|--------|-------|
| $R_{wp}$  | 6.53 % | 6.57% | 5.40% | 7.70%  | 6.15% |
| $R_{exp}$ | 2.35 % | 2.57% | 2.09% | 2.55 % | 2.15% |

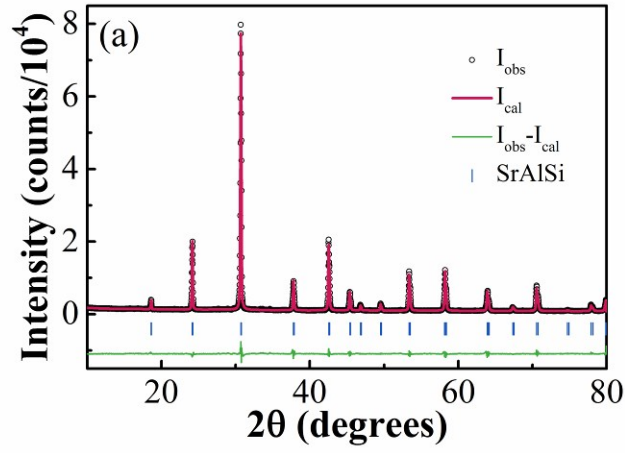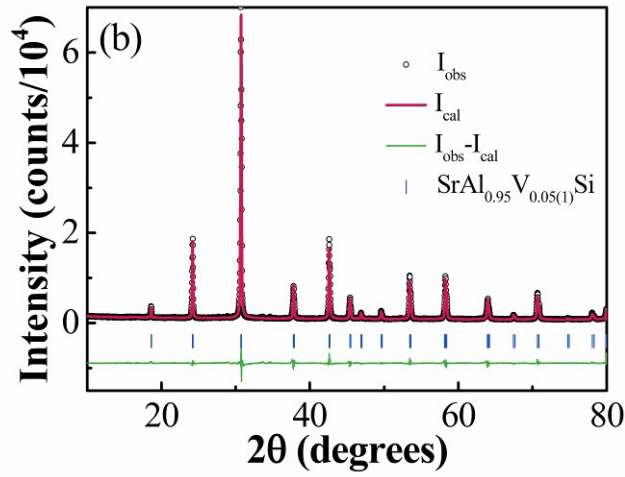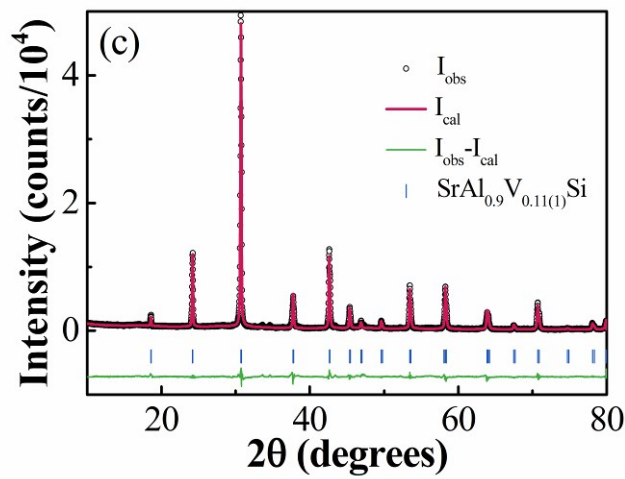

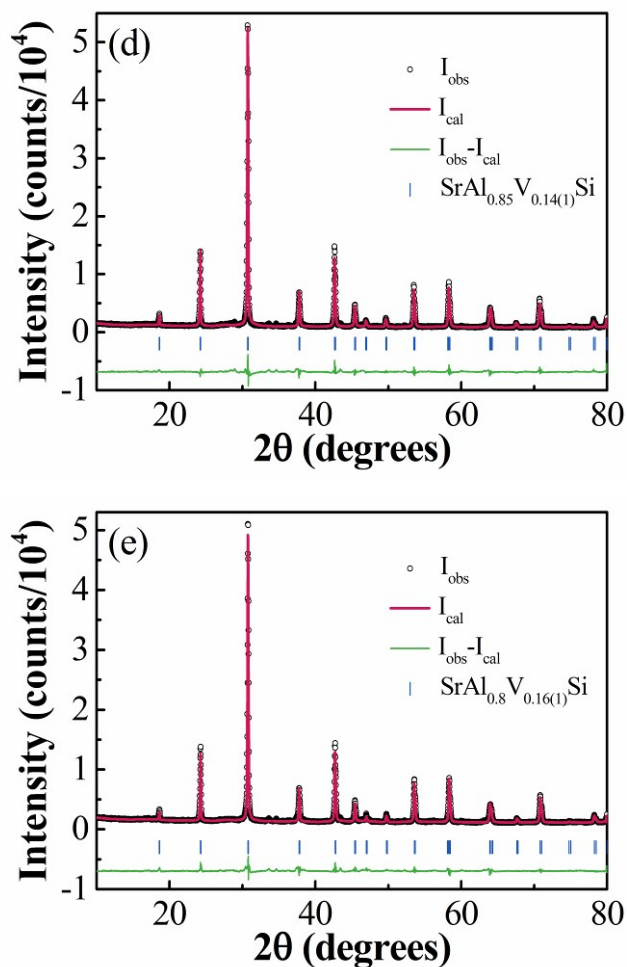

Figure S3. PXRD patterns for samples with nominal compositions of (a) SrAlSi, (b) SrAl<sub>0.95</sub>V<sub>0.05</sub>Si, (c) SrAl<sub>0.9</sub>V<sub>0.1</sub>Si, (d) SrAl<sub>0.85</sub>V<sub>0.15</sub>Si, and (e) SrAl<sub>0.8</sub>V<sub>0.2</sub>Si collected at room temperature, Cu K $\alpha$  radiation. The Rietveld refinement fits, difference profiles, and positions of Bragg peaks are also shown.

Table S3. Summary of Rietveld refinement parameters in hexagonal AlB<sub>2</sub> structure for SrAl<sub>1-x</sub>Cr<sub>x</sub>Si ( $x=0, 0.1, 0.2$  and  $0.3$ ).

| Nominal     | SrAlSi         | SrAl <sub>0.9</sub> Cr <sub>0.1</sub> Si     | SrAl <sub>0.8</sub> Cr <sub>0.2</sub> Si     | SrAl <sub>0.7</sub> Cr <sub>0.3</sub> Si     |
|-------------|----------------|----------------------------------------------|----------------------------------------------|----------------------------------------------|
| Refined     | SrAlSi         | SrAl <sub>0.9</sub> Cr <sub>0.09(2)</sub> Si | SrAl <sub>0.8</sub> Cr <sub>0.11(1)</sub> Si | SrAl <sub>0.7</sub> Cr <sub>0.13(1)</sub> Si |
| Space group | P6/ <i>mmm</i> |                                              |                                              |                                              |
| $a$ (Å)     | 4.2415 (4)     | 4.231 (1)                                    | 4.226 (1)                                    | 4.223 (1)                                    |
| $c$ (Å)     | 4.7499 (5)     | 4.7491 (1)                                   | 4.7497 (7)                                   | 4.7499 (2)                                   |
| $R_p$       | 4.64 %         | 7.74%                                        | 8.24 %                                       | 5.25 %                                       |
| $R_{wp}$    | 6.53 %         | 10.1 %                                       | 10.9 %                                       | 7.85 %                                       |
| $R_{exp}$   | 2.35 %         | 2.32 %                                       | 2.19 %                                       | 2.40 %                                       |

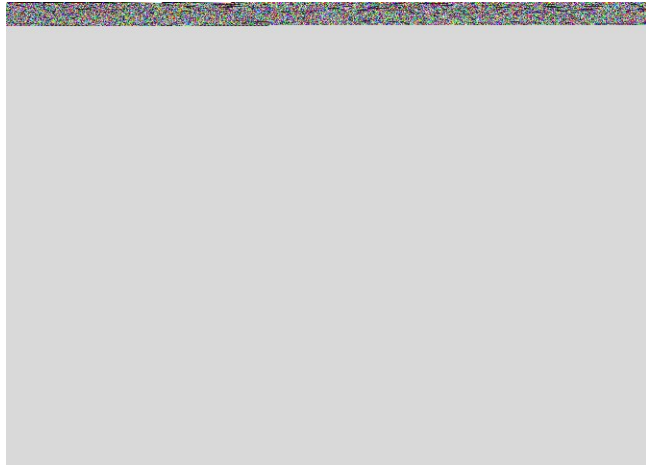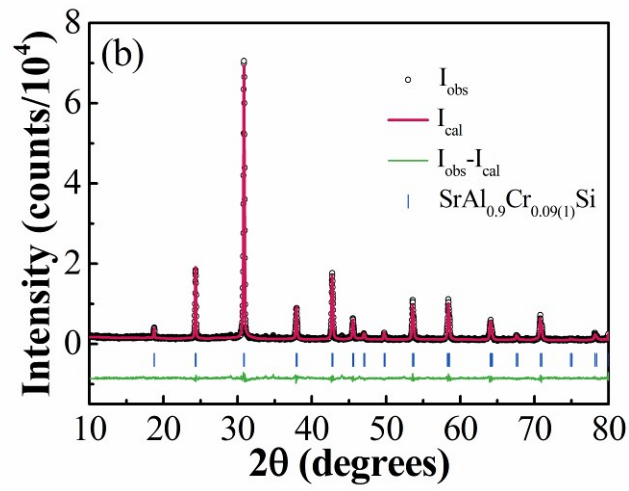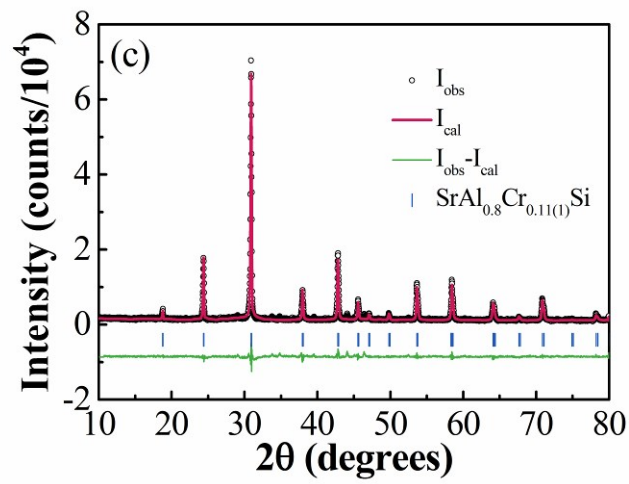

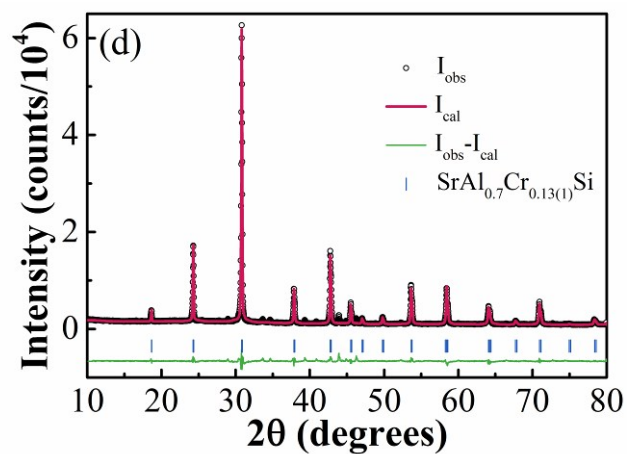

Figure S4. PXRd patterns for samples with nominal compositions of (a) SrAlSi, (b) SrAl<sub>0.9</sub>Cr<sub>0.1</sub>Si, (c) SrAl<sub>0.8</sub>Cr<sub>0.2</sub>Si, and (d) SrAl<sub>0.7</sub>Cr<sub>0.3</sub>Si collected at room temperature, Cu K $\alpha$  radiation. The Rietveld refinement fits, difference profiles, and positions of Bragg peaks are also shown.
